# Supplementary material for: Long-Term Clinical Results of Calcar Loading with Lateral Flare Anatomic Cementless Stem in Patients Younger Than 50 Years
Source: Research Square preprint supplement (doi:10.21203/rs.3.rs-6043438/v1), 2025-02-27
Supplement: Supplementary file 1 [file 7d7384a874f9f154f97d20f8.docx]

Table Ⅱ. Clinical Results

| Parameter | Preop. | Postop. |
| --- | --- | --- |
| Harris hip score* (points) | 48±9 (9-51) | 93±11 (20-100) |
| Pain score* (points) | 12±5 (10-30) | 42±5 (30-44) |
| Function score* (points) | 29±15 (0-40) | 45±9 (30-56) |
| WOMAC score* (points) | 65±15 (41-89) | 15±6 (4-29) |
| Thigh pain (n=336) | - | 6 (2%) |
| UCLA activity score* | 3 (1-4) | 8 (6-10) |
| Clicking sound | - | 70 hips (17%) |
| Squeaking sound | - | 38 hips (9%) |

* The values are given as the mean and the standard deviation, with the range in parentheses.

WOMAC = Western Ontario and McMaster University Osteoarthritis Index

UCLA = University of California, Los Angeles
