# Supplementary material for: Long-Term Clinical Results of Calcar Loading with Lateral Flare Anatomic Cementless Stem in Patients Younger Than 50 Years
Source: Research Square preprint supplement (doi:10.21203/rs.3.rs-6043438/v1), 2025-02-27
Supplement: Supplementary file 2 [file 8215eff9274d23582253423f.docx]

Table Ⅰ. Patient Demographics

| Number of patients (hips) | 336 (421) |
| --- | --- |
| Male: female ratio | 177 / 159 |
| Age* (years) | 46.3±3 (21-49) |
| Weight* (kg) | 65±13 (51-112) |
| Height* (cm) | 164±10 (148-186) |
| BMI* (kg/m2) | 28±4 (21-38) |
| Diagnosis |  |
| Osteonecrosis | 158 (47%) |
| Developmental dysplastic hip | 125 (37%) |
| Osteoarthritis | 31 (9%) |
| Traumatic arthritis | 12 (4%) |
| Childhood sepsis | 5 (1.5%) |
| Legg-Perthes disease | 2 (0.6%) |
| Rheumatoid arthritis | 2 (0.6%) |
| Follow-up* (years) | 21.5 (20-24) |

* The values are given as the mean and standard deviation, with the range in parentheses
