# Supplementary material for: Long-Term Clinical Results of Calcar Loading with Lateral Flare Anatomic Cementless Stem in Patients Younger Than 50 Years
Source: Research Square preprint supplement (doi:10.21203/rs.3.rs-6043438/v1), 2025-02-27
Supplement: Supplementary file 3 [file e2a0a35fb86147337d5d8bea.docx]

Table Ⅲ. Radiographic Results for 421 hips

| Parameter | Findings |
| --- | --- |
| Dorr bone type (n. [%]) |  |
| A | 362 (86) |
| B | 21 (5) |
| C | 38 (9) |
| Acetabular component position* (deg) |  |
| Inclination | 44 (37 to 49) |
| Anteversion | 21 (17 to 25) |
| Femoral component frontal position (n, [%]) |  |
| Neutral position | 341 (81) |
| Varus position | 72 (17) |
| Valgus position | 8 (2) |
| Femoral component sagittal position (n, [%]) |  |
| Anatomic | 421 (100) |
| Center of rotation* |  |
| Horizontal (mm) | 42 (35-48) |
| Vertical (mm) | 16 (13-22) |
| Femoral offset* (mm) | 41 (35-49) |
| Abductor moment arm* (mm) | 46 (40-81) |
| Femoral neck length* (mm) | 36 (32-41) |
| Limb-length discrepancy÷ (mm) | 36 (32-41) |
| Radiolucent line (> 1 mm) (no. [%]) | 7 (1) |
| Migration of the femoral component (no. [%]) | 0 (0) |
| Migration of the femoral component | 7 (1) |

* The values are given as the mean, with the range in parentheses.

÷ The values are given as the mean and the standard deviation, with the range in parentheses
