# Supplementary material for: Long-Term Clinical Results of Calcar Loading with Lateral Flare Anatomic Cementless Stem in Patients Younger Than 50 Years
Source: Research Square preprint supplement (doi:10.21203/rs.3.rs-6043438/v1), 2025-02-27
Supplement: Supplementary file 4 [file ea5ceccbc7dedb6679996291.docx]

Table Ⅳ. Bone Mineral Density Around Femoral Stem

| Follow-up period | Zone 1 | Zone 7 |
| --- | --- | --- |
| 1 week after surgery (SD) | 3.182 g/cm2 (0.281) | 3.283 g/cm2 (0.439) |
| 21.5 years after surgery (SD) | 3.212 g/cm2 (0.219) | 2.618 g/cm2 (0.321) |
| Difference (%) | 0.03 g/cm2 (0.9) | 0.665 g/cm2 (-2.0) |
| P-value (student’s paired t-test) | 0.061 | 0.001 |
